# Supplementary material for: Meta-sGWAS: Integrating brain spatial interactions to uncover genetic variants in Bipolar Disorder
Source: Research Square preprint supplement (doi:10.21203/rs.3.rs-5791934/v1), 2025-10-31

## Supplementary Figure S1

**a**

Synthetic examples: 10 ROIs in 20 samples

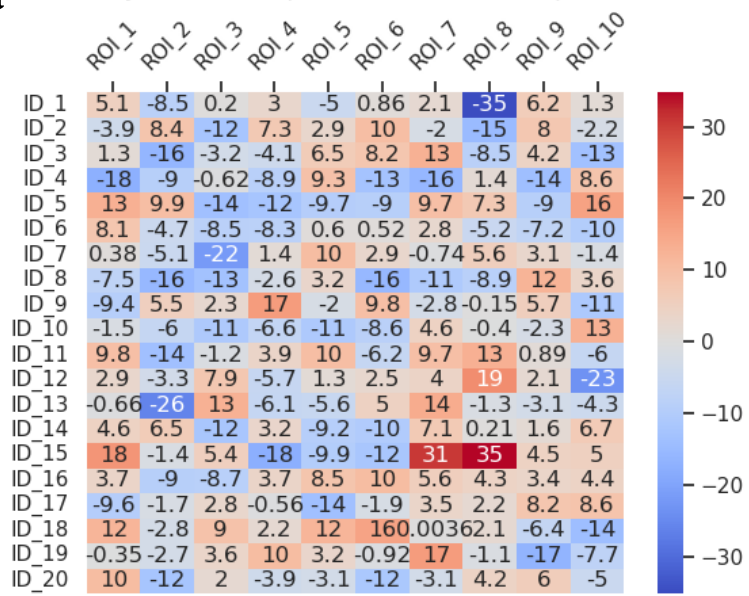**b**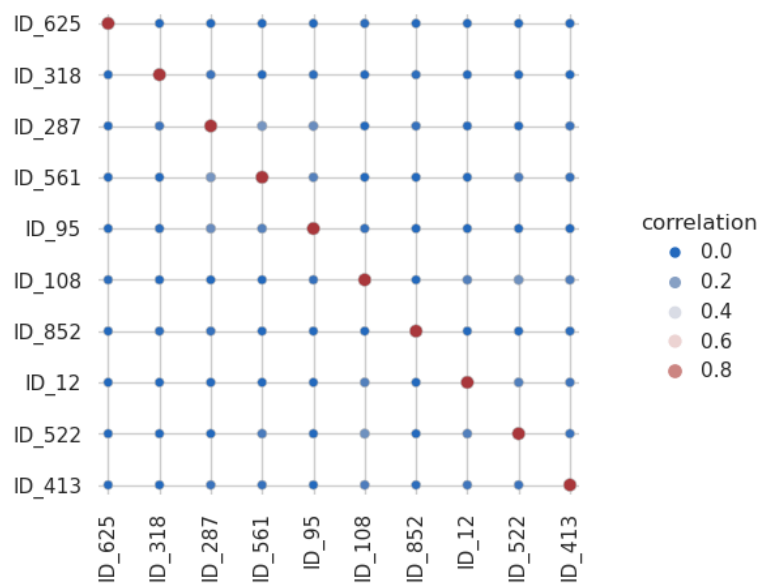

## Supplementary Figure S2

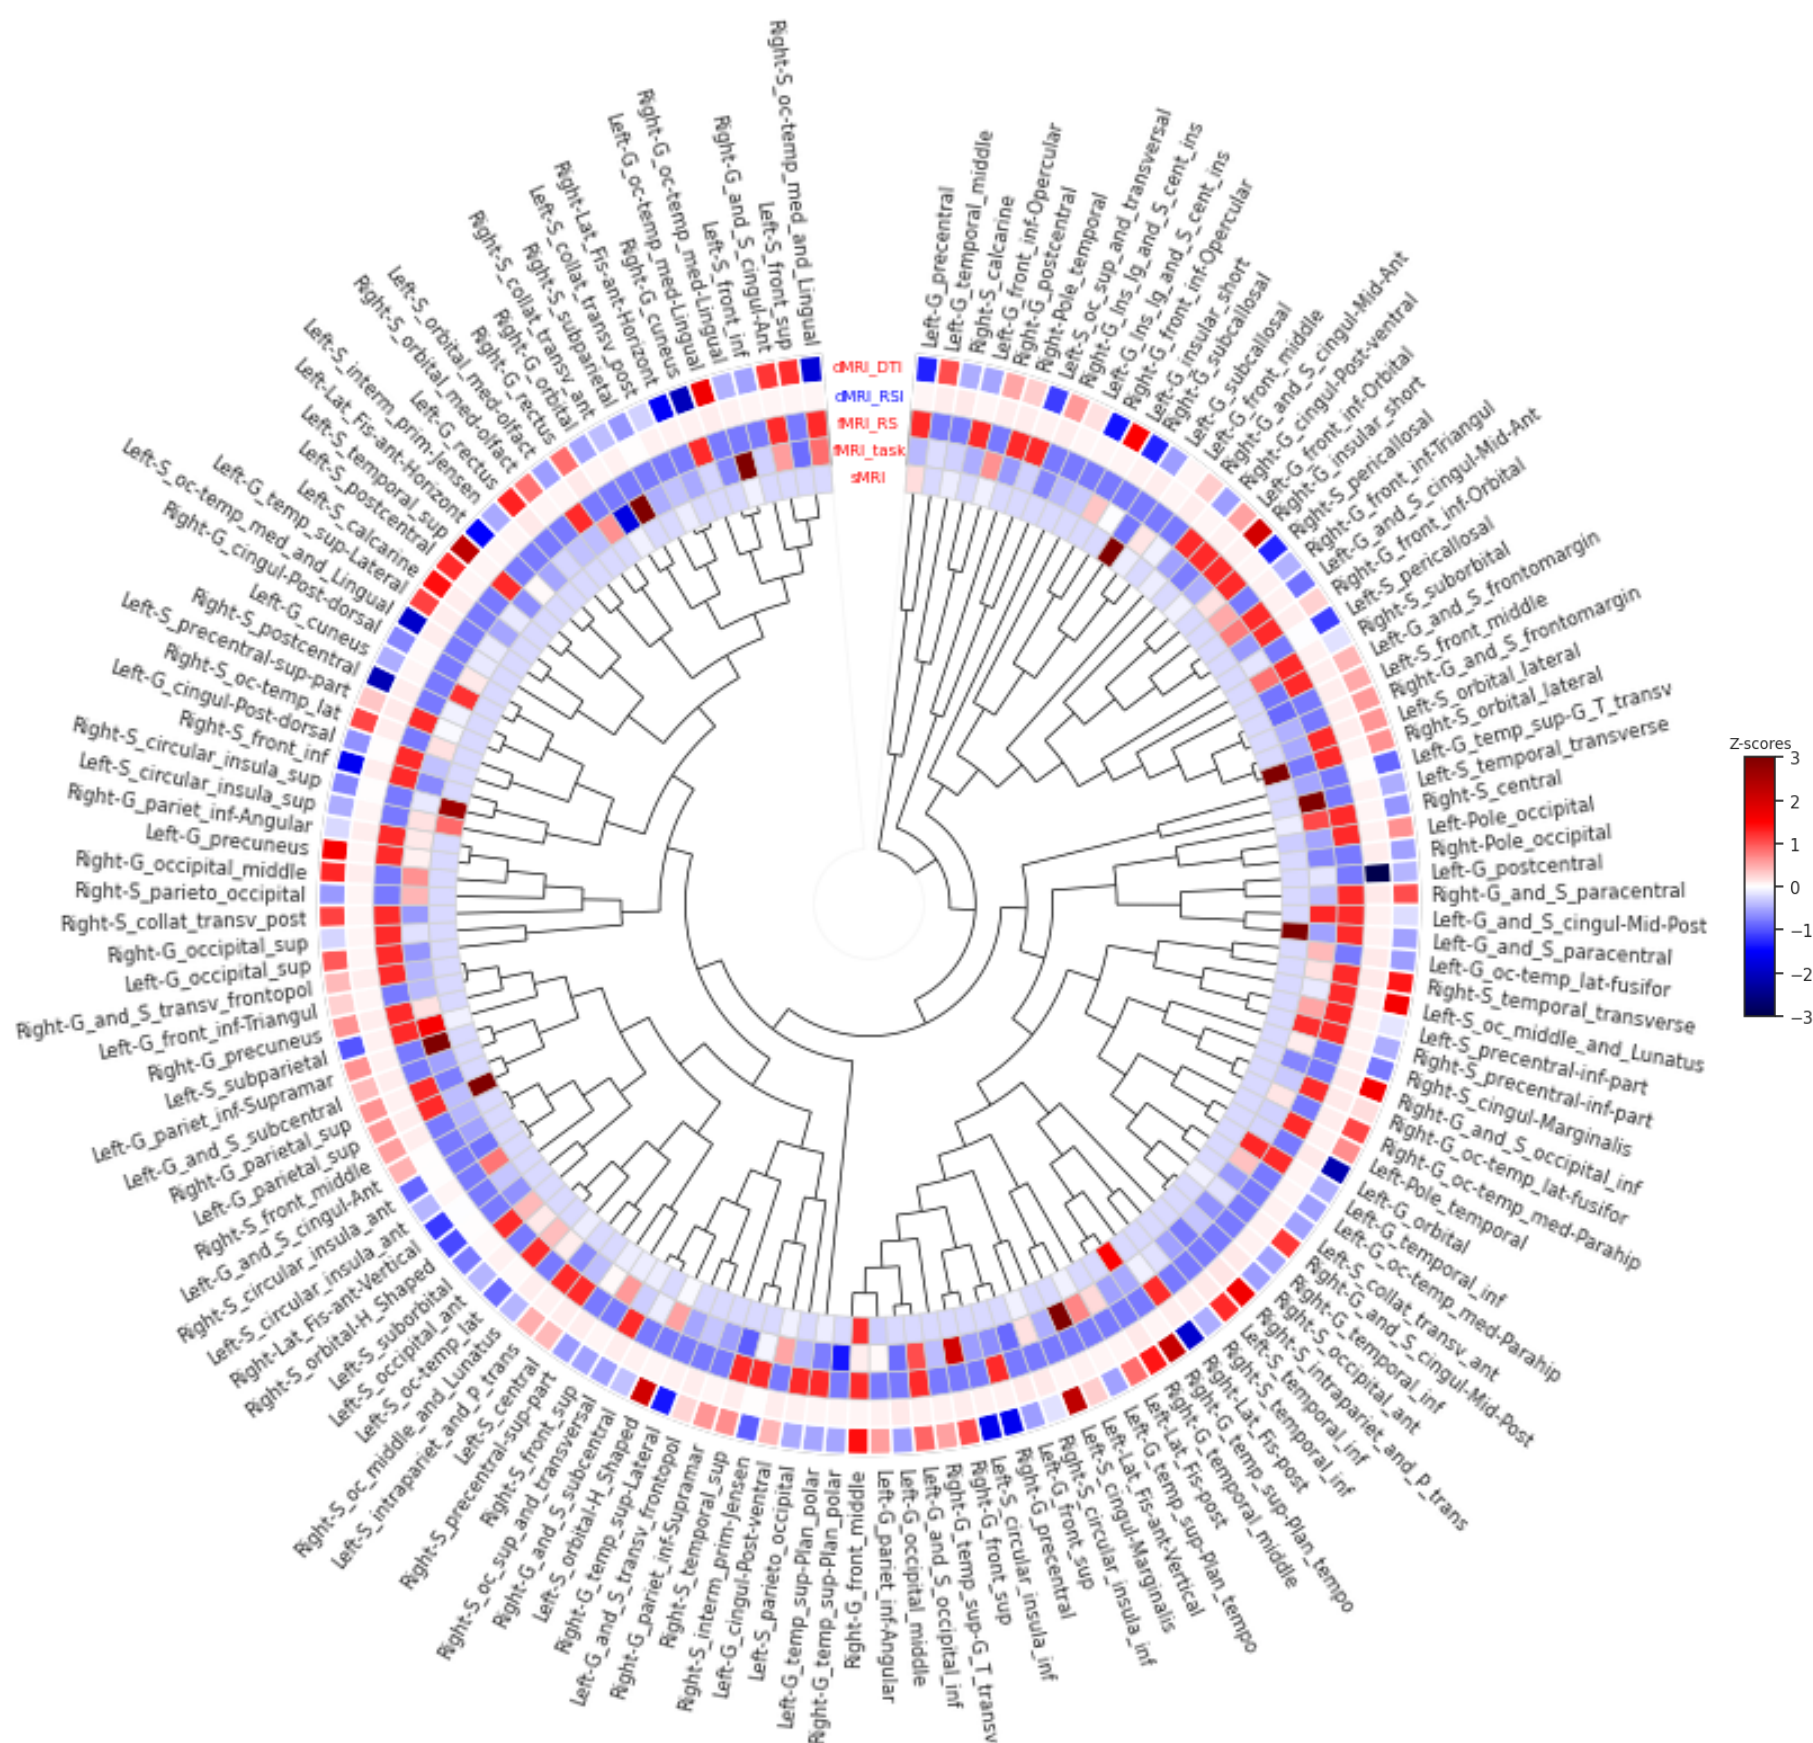

Supplementary Figure S3

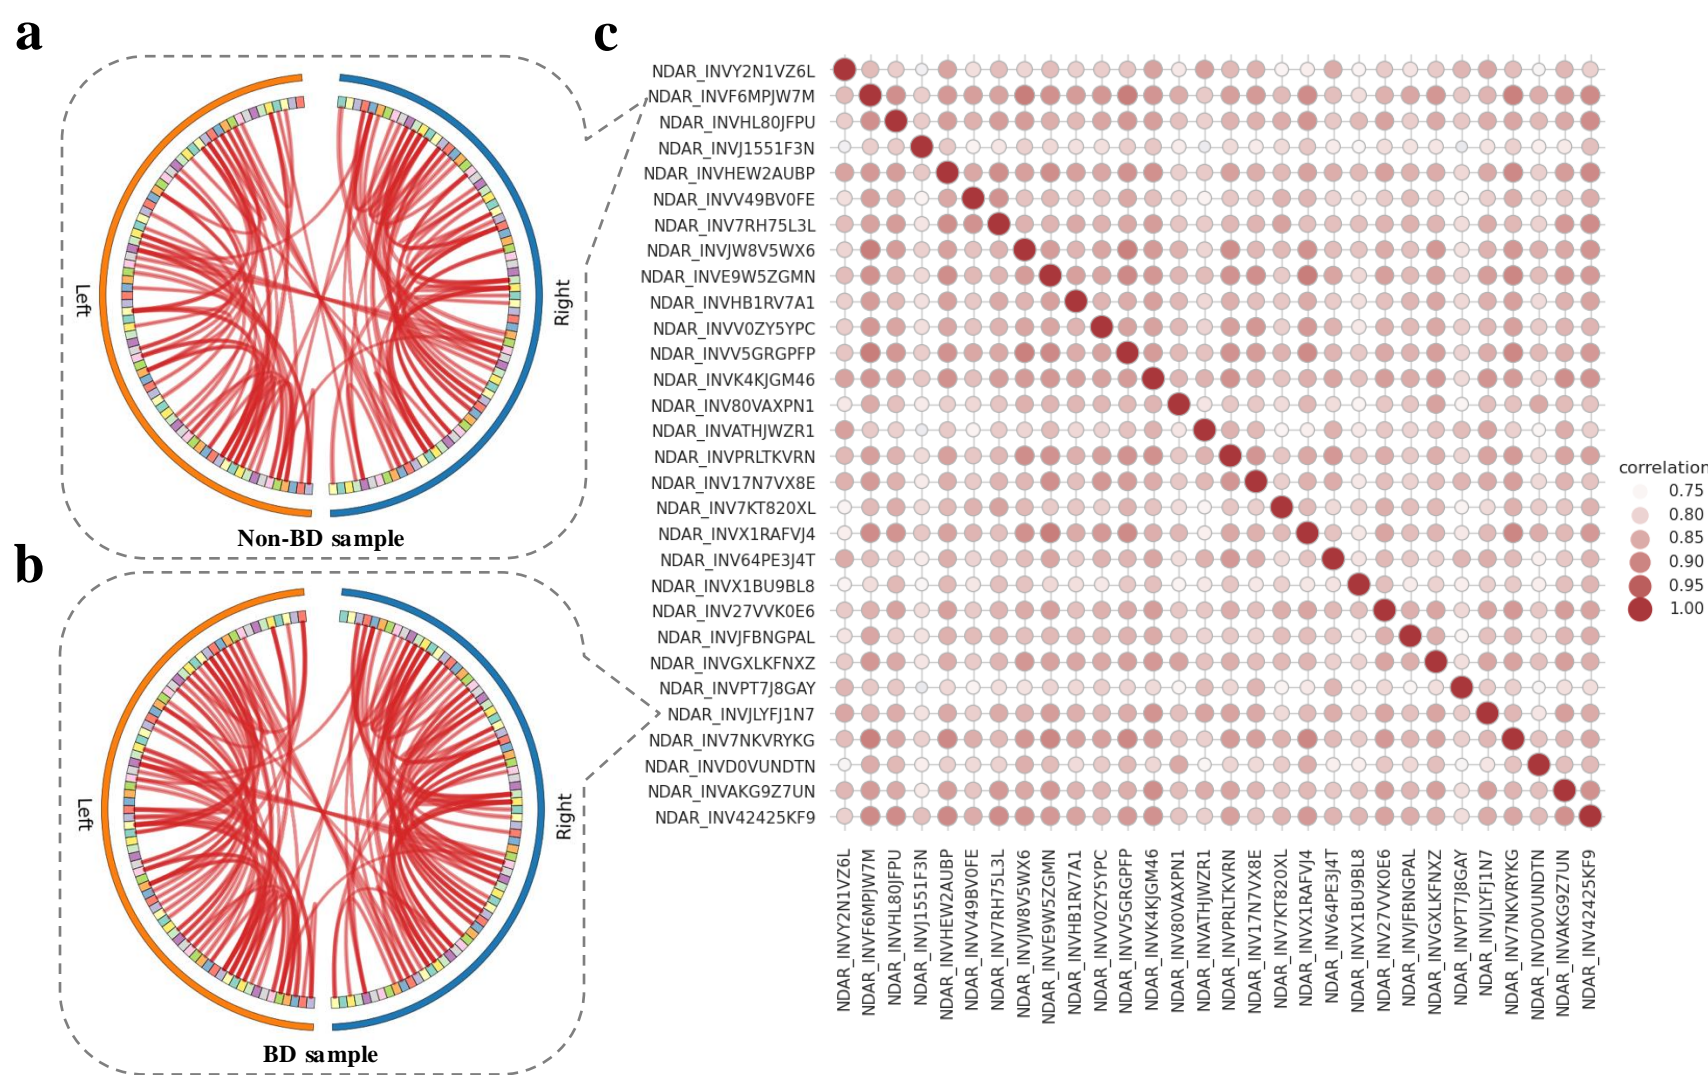



Supplementary Figure S4

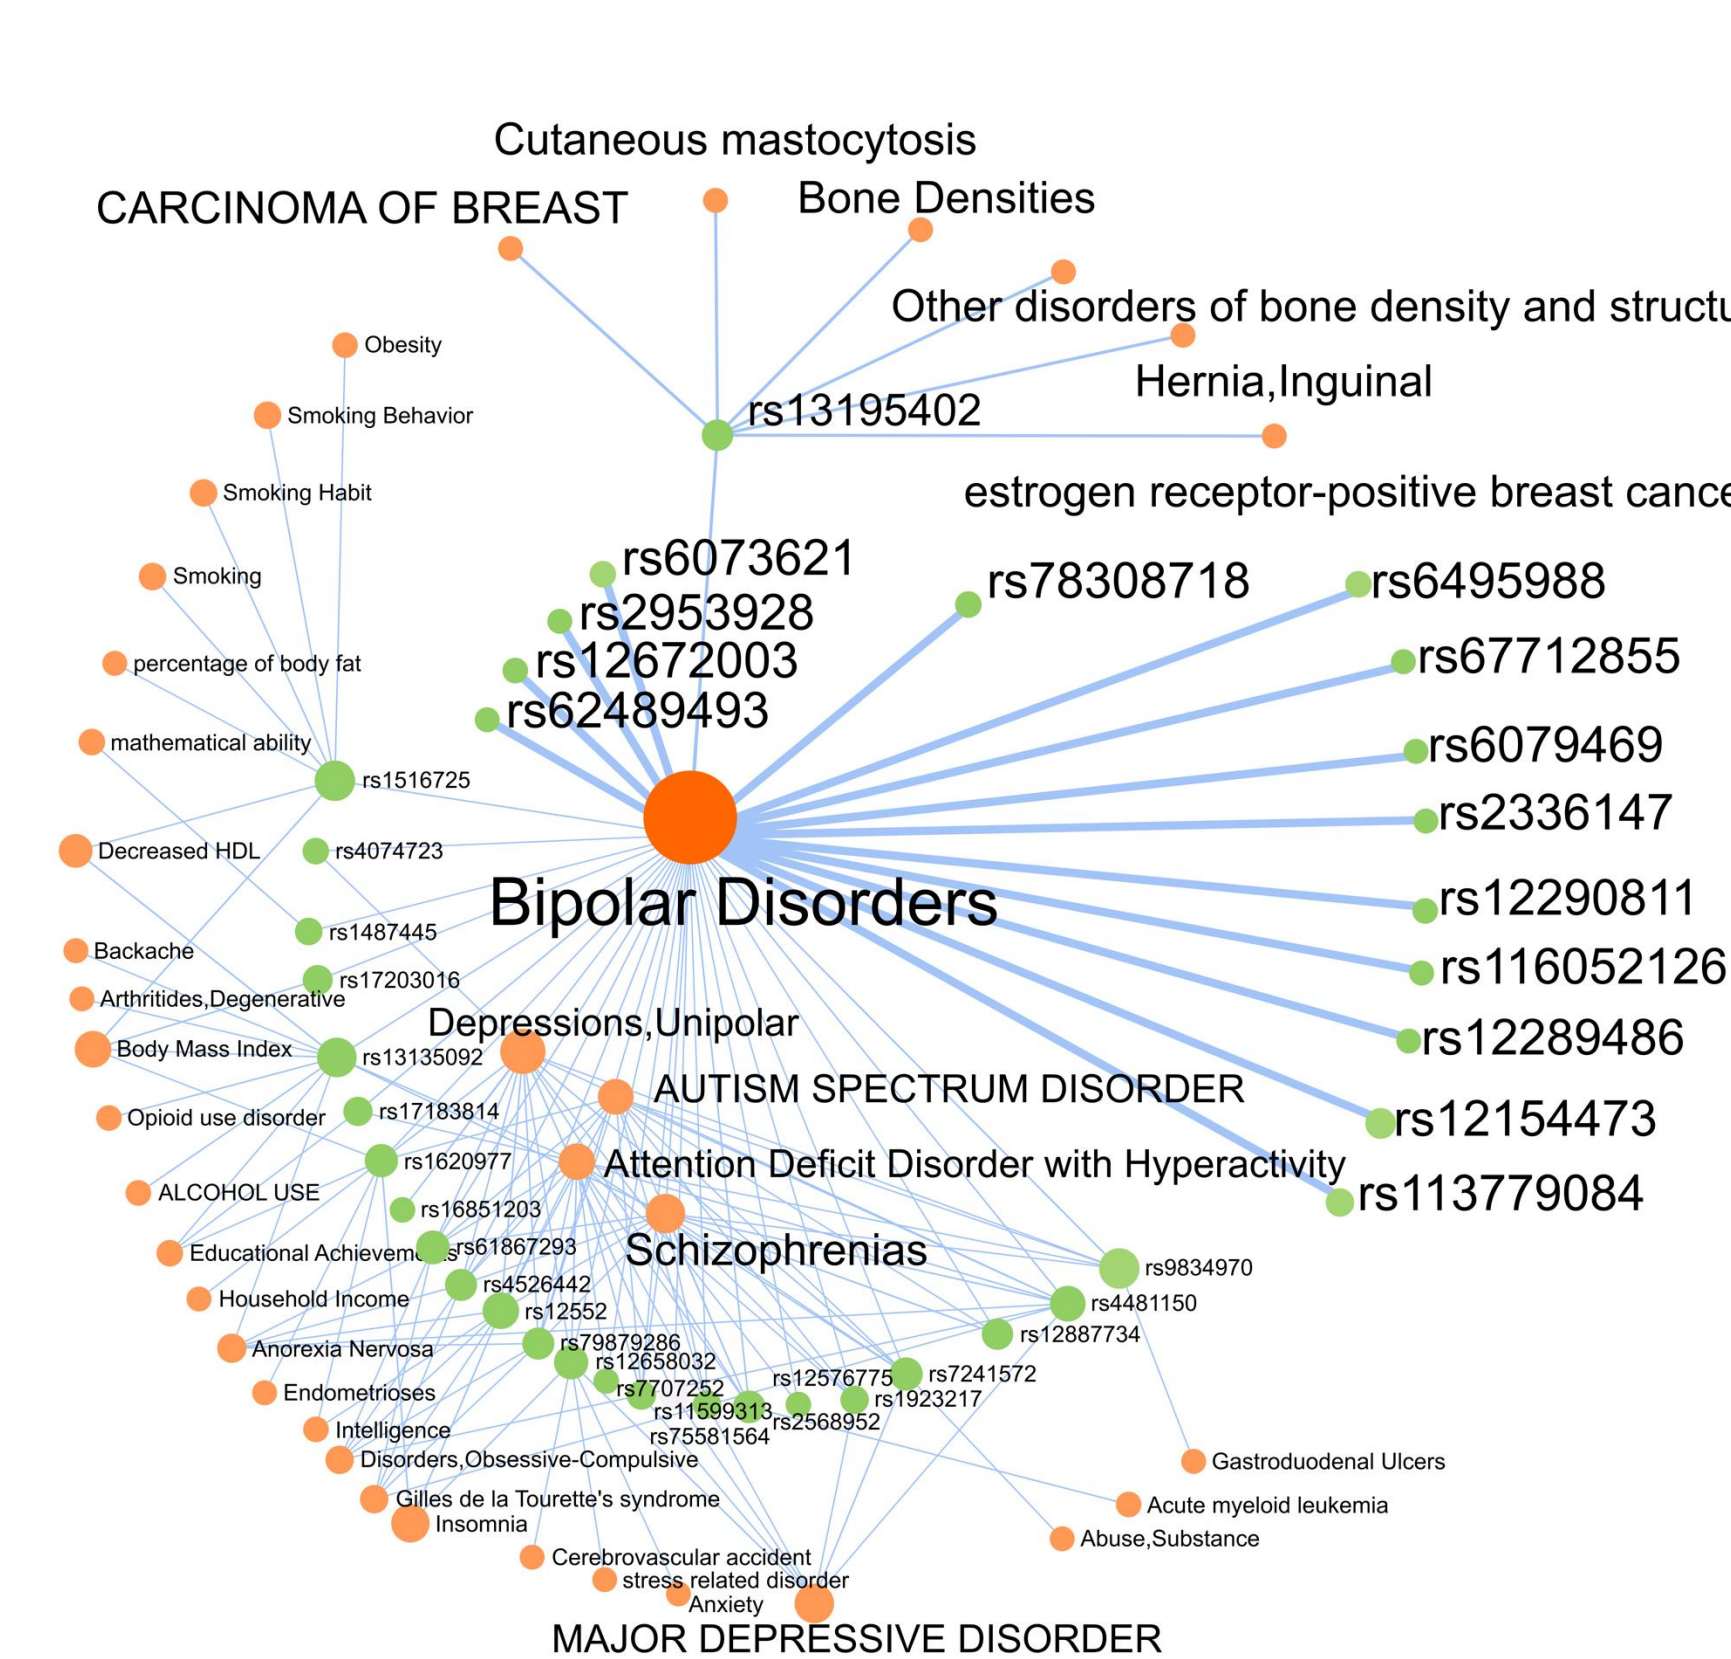

**Fig 8. Network diagram between SNPs and psychiatric disorder.** The network shows genetic associations connecting Bipolar Disorders to various psychiatric and physical health conditions. These significant SNPs are linked to multiple disorders and other psychiatric disorders, illustrating potential shared genetic underpinnings.

# Supplementary Figure S5

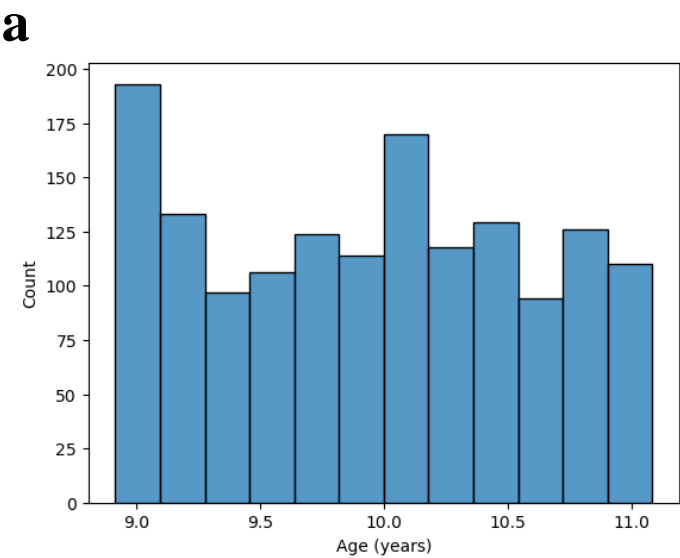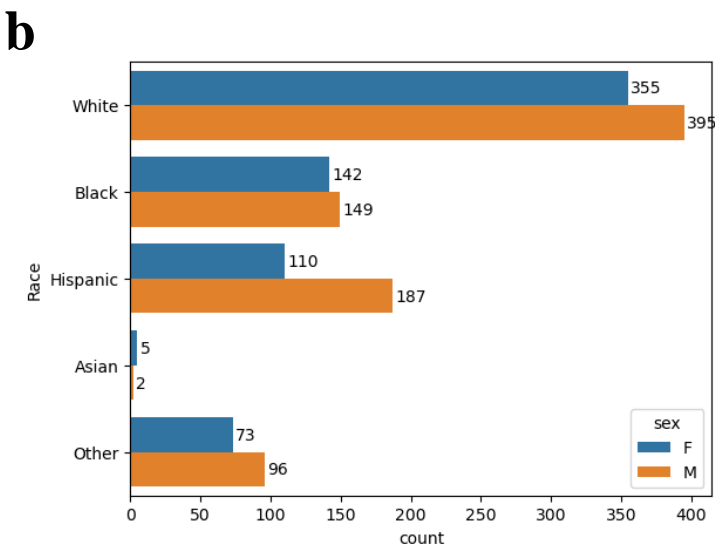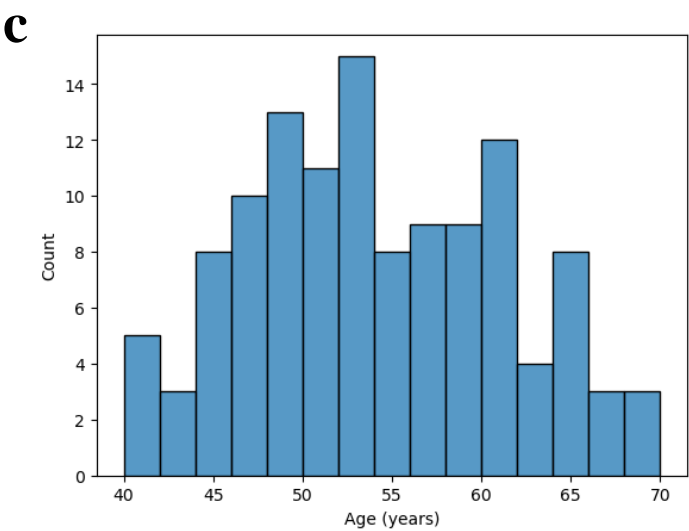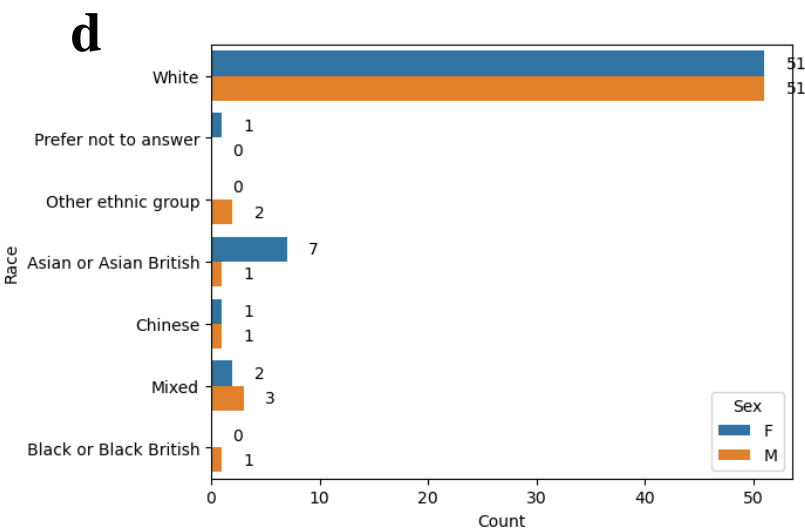

# Supplementary Figure S6

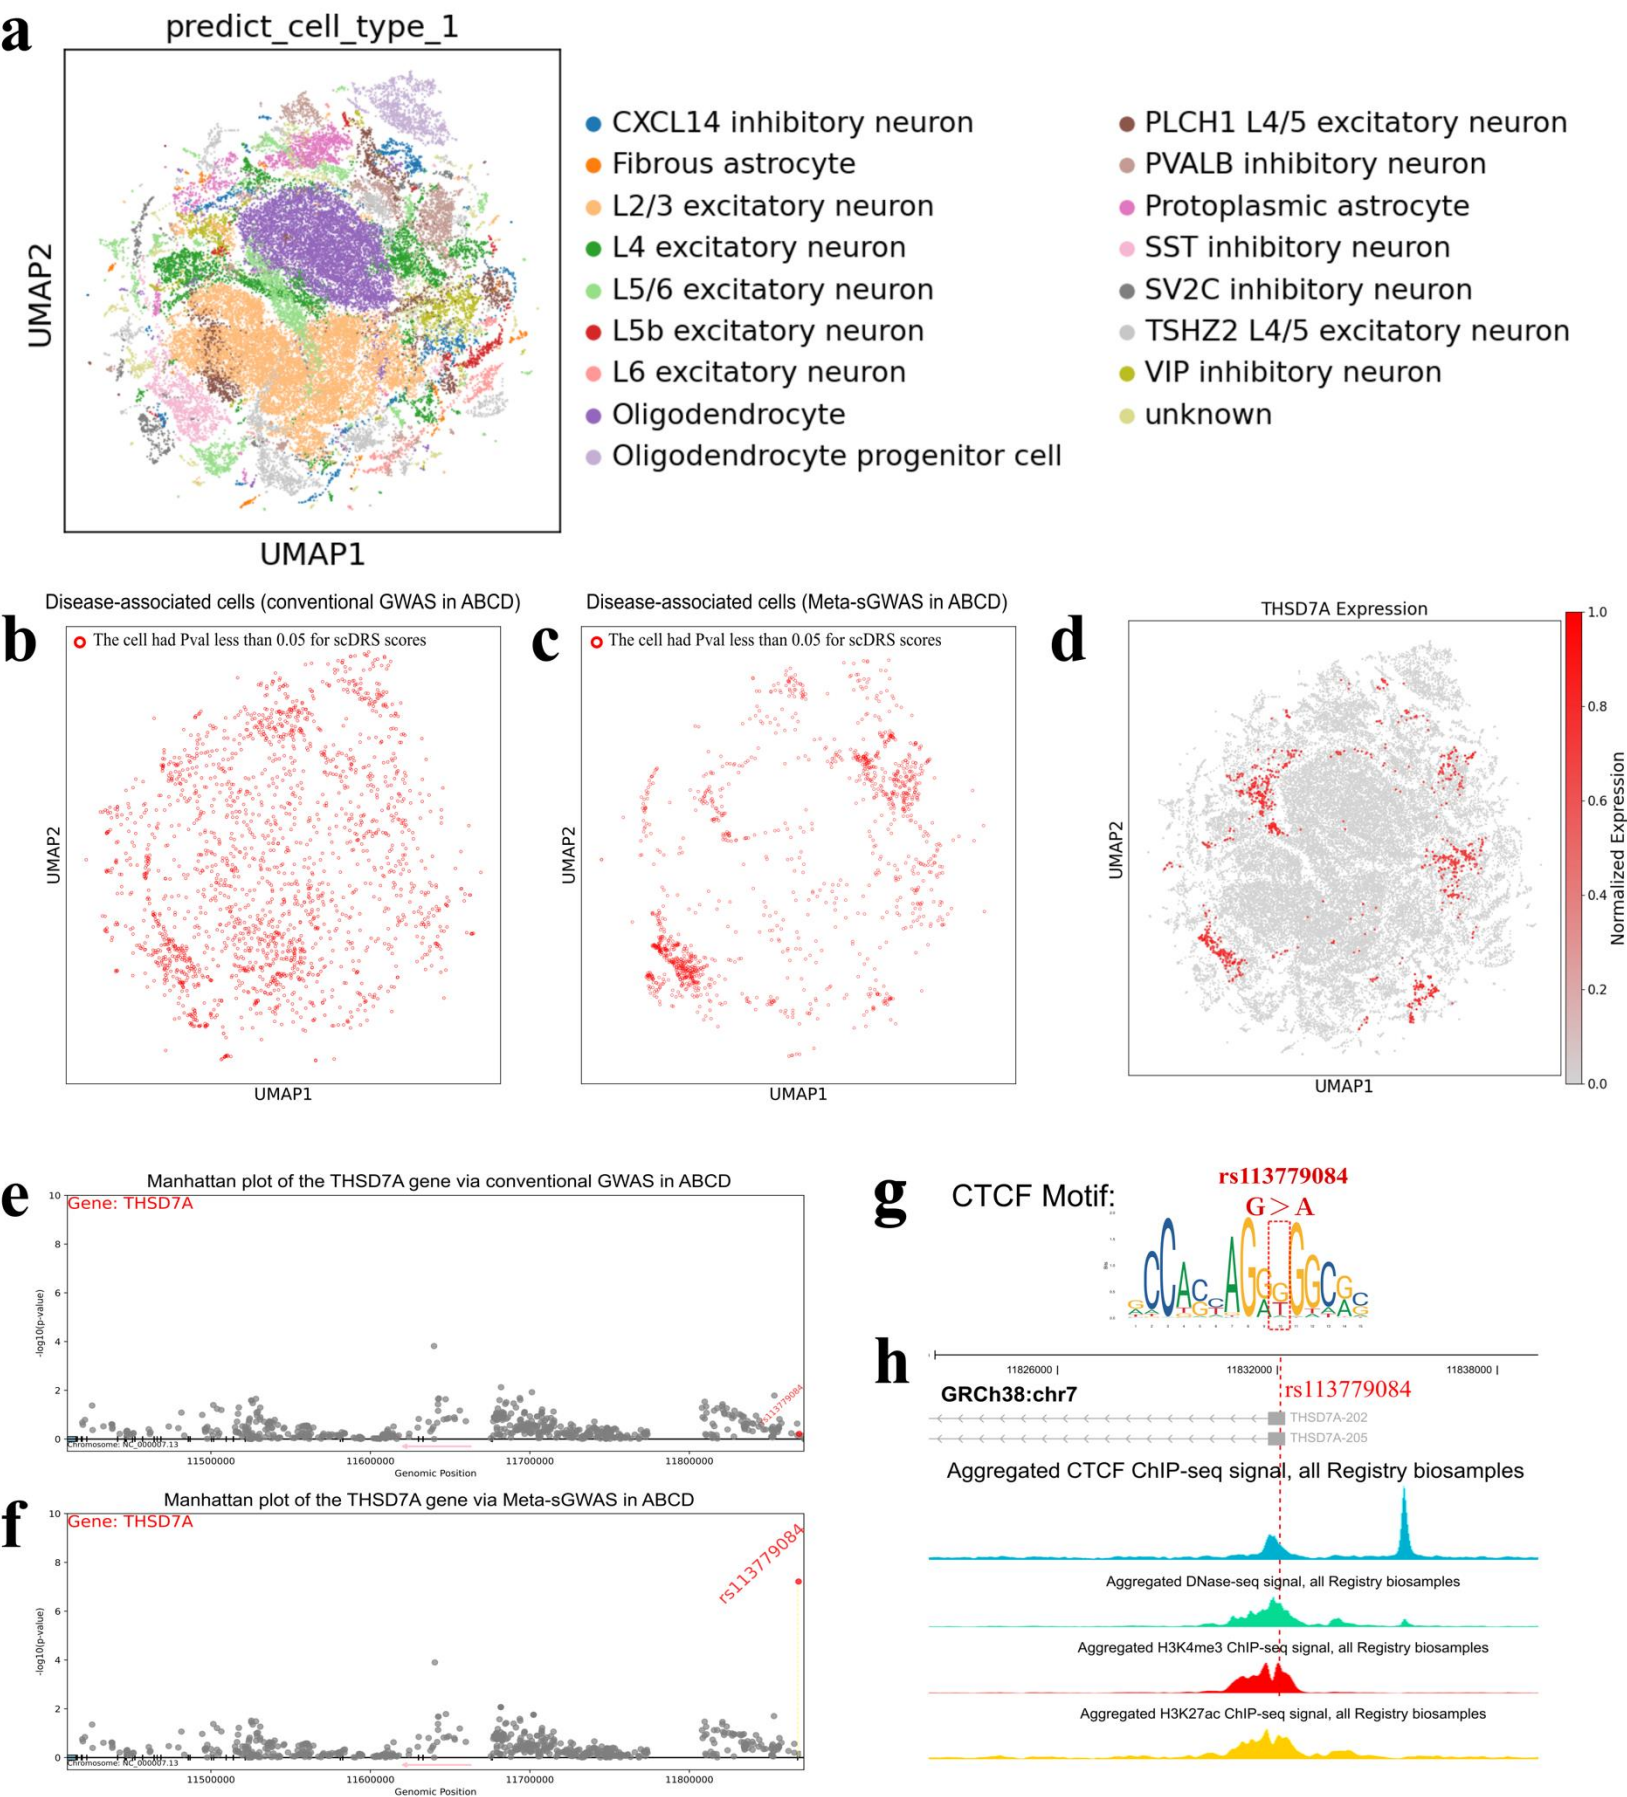

Supplement: Supplementary file 1 [file db6fd444396507af593046c7.pdf]
