# Supplementary material for: Meta-sGWAS: Integrating brain spatial interactions to uncover genetic variants in Bipolar Disorder
Source: Research Square preprint supplement (doi:10.21203/rs.3.rs-5791934/v1), 2025-10-31
Supplement: Supplementary file 1 [file dc0f14c2f5fe60817bb0196c.xlsx]

## Sheet: S1
SNP	A1	A2	N	AF	SCORE	VAR	PVAL_Meta-sGWAS-ABCD	PVAL_Meta-sGWAS-UKB
rs1620977	A	G	7440	0.634879	90.8248	416.328	8.53535e-06	4.50944e-10			Column Name	Description
rs2568952	C	G	7934	0.569448	110.345	458.281	2.54288e-07	5.24788e-13			SNP	The identifier for the single nucleotide polymorphism (SNP)
rs1923217	T	C	7946	0.52454	106.342	523.615	3.36318e-06	5.24785e-11			A1	The effect allele, or the allele that is tested for association with the trait.
rs16851203	C	T	7676	0.70284	65.6629	212.122	6.5304e-06	3.08068e-08			A2	The other allele, or the non-effect/reference allele.
rs17183814	A	G	7992	0.715341	73.8209	230.74	1.17507e-06	3.98783e-11			N	Sample size, representing the number of individuals included in the analysis.
rs17203016	G	A	7564	0.680064	74.8916	242.548	1.51859e-06	1.15835e-07			AF	Allele frequency, specifically the frequency of the effect allele (A1) in the population.
rs9834970	C	T	7992	0.518382	Inf	945.722	0	0			SCORE	The association score or test statistic for the SNP.
rs2336147	T	C	7968	0.508977	123.443	556.064	1.65111e-07	9.00785e-12			VAR	Variance of the association score, reflecting its variability.
rs4481150	T	C	7406	0.502876	132.002	558.714	2.3434e-08	1.66847e-12			PVAL_Meta-sGWAS-ABCD	The p-value from the Meta-sGWAS results for the ABCD dataset.
rs1516725	T	C	7992	0.683434	Inf	959.483	0	0			PVAL_Meta-sGWAS-UKB	The p-value from the Meta-sGWAS results for the UKB dataset.
rs13135092	G	A	7898	0.927242	56.8799	159.117	6.50701e-06	6.73374e-07
rs78308718	C	T	7976	0.791903	83.3135	340.472	6.32637e-06	4.39394e-09
rs7707252	G	A	7246	0.623792	80.6784	316.149	5.6939e-06	3.39356e-07
rs12658032	A	G	7458	0.596206	162.116	606.838	4.67383e-11	2.04435e-14
rs13195402	T	G	7992	0.928156	126.699	355.69	1.84296e-11	5.25305e-15
rs1487445	T	C	7992	0.548605	126.665	636.037	5.10164e-07	4.79321e-13
rs12154473	A	G	7330	0.484924	113.782	584.583	2.52634e-06	2.90286e-12
rs113779084	A	G	7536	0.730012	114.646	458.845	8.69177e-08	6.89801e-12
rs12672003	G	A	7890	0.892676	70.3002	225.34	2.82506e-06	1.5881e-07
rs116052126	A	G	7540	0.502795	87.0937	264.716	8.65089e-08	1.07064e-08
rs79879286	C	G	7730	0.695731	97.032	287.265	1.03452e-08	7.35454e-10
rs12704290	A	G	7966	0.515644	82.0355	213.643	1.99404e-08	1.9973e-07
rs62489493	G	C	7540	0.879037	85.5987	283.937	3.77604e-07	1.53547e-12
rs2953928	A	G	7892	0.938751	59.0145	164.829	4.29318e-06	6.31001e-07
rs10959753	T	C	7608	0.666141	115.266	411.002	1.30318e-08	3.42537e-12
rs4526442	C	T	7956	0.67823	86.2941	302.905	7.11321e-07	1.01234e-08
rs11599313	T	C	7810	0.670166	87.2587	267.166	9.37264e-08	5.22227e-07
rs61867293	T	C	7950	0.666981	102.598	354.095	4.97292e-08	1.6976e-11
rs12576775	G	A	7992	0.674674	86.6453	273.402	1.6044e-07	1.56792e-06
rs12290811	A	T	7856	0.67458	99.0135	277.945	2.86735e-09	3.20668e-07
rs12289486	T	C	7736	0.90191	61.6283	175.699	3.32941e-06	6.91232e-06
rs4074723	A	C	7624	0.555482	102.35	414.41	4.96306e-07	1.11961e-08
rs12552	A	G	7614	0.545902	Inf	1050.15	0	0
rs12887734	T	G	7952	0.498996	92.279	426.401	7.86495e-06	5.43705e-10
rs6495988	T	C	7734	0.803856	78.8338	296.532	4.69431e-06	7.74795e-09
rs75581564	A	G	7638	0.711181	79.9882	220.678	7.26423e-08	4.13367e-10
rs7241572	A	G	7362	0.66558	73.0467	269.594	8.63401e-06	1.75015e-07
rs6079469	A	T	7766	0.660508	90.6739	309.782	2.58082e-07	4.37185e-07
rs67712855	G	T	7712	0.721288	100.273	391.688	4.05112e-07	4.11684e-09
rs6073621	G	A	7972	0.707045	90.7947	369.756	2.33829e-06	1.21674e-07

## Sheet: S2
SNP	chr	position	riskAllele	consequence	gene	disease	semanticType	PValue	scoreVDA	reference_PMID
rs13195402	6	26463347	G	stop_gained	BTN2A1	Schizophrenias	Mental or Behavioral Dysfunction (T048)	3.0E-39	0.6	37467357		Column Name	Description
rs13195402	6	26463347	G	stop_gained	BTN2A1	Schizophrenias	Mental or Behavioral Dysfunction (T048)	1.0E-38	0.6	37467357		SNP	The identifier for the single nucleotide polymorphism (SNP)
rs13195402	6	26463347	G	stop_gained	BTN2A1	CARCINOMA OF BREAST	Neoplastic Process (T191)	1.0E-38	0.6	37467357		chr	Chromosome where the SNP is located.
rs13195402	6	26463347	G	stop_gained	BTN2A1	estrogen receptor-positive breast cancer	Neoplastic Process (T191)	3.0E-39	0.6	37467357		position	Genomic position of the SNP on the chromosome.
rs13195402	6	26463347		stop_gained	BTN2A1	Other disorders of bone density and structure	Disease or Syndrome (T047)	2.0E-133	0.6	37500982		riskAllele	The allele associated with increased risk for the disease.
rs13195402	6	26463347		stop_gained	BTN2A1	Bone Densities	Clinical Attribute (T201)	2.0E-133	0.6	37500982		consequence	The functional consequence of the SNP on the gene (e.g., missense, intronic).
rs13195402	6	26463347	G	stop_gained	BTN2A1	Hernia,Inguinal	Anatomical Abnormality (T190)	4.0E-8	0.6	34382107		gene	The gene associated with the SNP.
rs1487445	6	98117335	C	intron_variant		Bipolar Disorders	Mental or Behavioral Dysfunction (T048)	1.0E-15	0.6	34002096		disease	Disease associated with the SNP.
rs13195402	6	26463347	G	stop_gained	BTN2A1	Bipolar Disorders	Mental or Behavioral Dysfunction (T048)	6.0E-15	0.6	34002096		semanticType	Category or type of disease (e.g., metabolic, psychiatric).
rs13195402	6	26463347	T	stop_gained	BTN2A1	Cutaneous mastocytosis	Neoplastic Process (T191)	3.0E-7	0.6	32752121		PValue	P-value representing the significance of the SNP-disease association.
rs1487445	6	98117335	T	intron_variant		mathematical ability	Mental Process (T041)	9.0E-52	0.6	30038396		scoreVDA	Variant Disease Association score, measuring the strength of the SNP-disease association on DisGeNet database.
rs1487445	6	98117335	C	intron_variant		mathematical ability	Mental Process (T041)	7.0E-31	0.6	30038396		reference_PMID	PubMed ID of the reference study supporting the association.
rs1487445	6	98117335	T	intron_variant		mathematical ability	Mental Process (T041)	6.0E-71	0.6	30038396
rs1516725	3	186106215		intron_variant	ETV5	Bipolar Disorders	Mental or Behavioral Dysfunction (T048)		0.7	31754094
rs1516725	3	186106215		intron_variant	ETV5	Obesity	Disease or Syndrome (T047)		0.7	31754094
rs1516725	3	186106215	T	intron_variant	ETV5	Bipolar Disorders	Mental or Behavioral Dysfunction (T048)	1.0E-24	0.7	31754094
rs1516725	3	186106215	C	intron_variant	ETV5	Obesity	Disease or Syndrome (T047)	3.0E-9	0.7	23563607
rs1516725	3	186106215		intron_variant	ETV5	percentage of body fat	Finding (T033)	1.0E-8	0.6	37867527
rs1516725	3	186106215	T	intron_variant	ETV5	Body Mass Index	Clinical Attribute (T201)	2.0E-8	0.6	35399580
rs1516725	3	186106215	C	intron_variant	ETV5	Decreased HDL	Finding (T033)	3.0E-29	0.6	34887591
rs1516725	3	186106215		intron_variant	ETV5	Decreased HDL	Finding (T033)	2.0E-46	0.6	34887591
rs1516725	3	186106215	T	intron_variant	ETV5	Body Mass Index	Clinical Attribute (T201)	1.0E-24	0.6	31754094
rs1516725	3	186106215		intron_variant	ETV5	Body Mass Index	Clinical Attribute (T201)	5.0E-7	0.6	31217584
rs1516725	3	186106215	T	intron_variant	ETV5	Smoking Behavior	Individual Behavior (T055)	6.0E-15	0.6	28443625
rs1516725	3	186106215	T	intron_variant	ETV5	Smoking	Individual Behavior (T055)	8.0E-12	0.6	28443625
rs1516725	3	186106215	T	intron_variant	ETV5	Body Mass Index	Clinical Attribute (T201)	8.0E-12	0.6	28443625
rs1516725	3	186106215	C	intron_variant	ETV5	Body Mass Index	Clinical Attribute (T201)	1.0E-24	0.6	28892062
rs1516725	3	186106215	T	intron_variant	ETV5	Body Mass Index	Clinical Attribute (T201)	7.0E-9	0.6	28443625
rs1516725	3	186106215	T	intron_variant	ETV5	Body Mass Index	Clinical Attribute (T201)	2.0E-11	0.6	28443625
rs1516725	3	186106215	T	intron_variant	ETV5	Smoking	Individual Behavior (T055)	3.0E-16	0.6	28443625
rs1516725	3	186106215	T	intron_variant	ETV5	Smoking	Individual Behavior (T055)	6.0E-15	0.6	28443625
rs1516725	3	186106215	T	intron_variant	ETV5	Body Mass Index	Clinical Attribute (T201)	1.0E-8	0.6	28443625
rs1516725	3	186106215	T	intron_variant	ETV5	Smoking Habit	Individual Behavior (T055)	3.0E-16	0.6	28443625
rs1516725	3	186106215	T	intron_variant	ETV5	Smoking Habit	Individual Behavior (T055)	8.0E-12	0.6	28443625
rs1516725	3	186106215	T	intron_variant	ETV5	Smoking Behavior	Individual Behavior (T055)	8.0E-12	0.6	28443625
rs1516725	3	186106215	T	intron_variant	ETV5	Smoking Behavior	Individual Behavior (T055)	3.0E-16	0.6	28443625
rs1516725	3	186106215	T	intron_variant	ETV5	Body Mass Index	Clinical Attribute (T201)	3.0E-16	0.6	28443625
rs1516725	3	186106215	T	intron_variant	ETV5	Smoking	Individual Behavior (T055)	2.0E-11	0.6	28443625
rs1516725	3	186106215	T	intron_variant	ETV5	Smoking Habit	Individual Behavior (T055)	6.0E-15	0.6	28443625
rs1516725	3	186106215	T	intron_variant	ETV5	Smoking Habit	Individual Behavior (T055)	2.0E-11	0.6	28443625
rs1516725	3	186106215	T	intron_variant	ETV5	Body Mass Index	Clinical Attribute (T201)	7.0E-10	0.6	28443625
rs1516725	3	186106215	T	intron_variant	ETV5	Body Mass Index	Clinical Attribute (T201)	6.0E-15	0.6	28443625
rs1516725	3	186106215	T	intron_variant	ETV5	Smoking Behavior	Individual Behavior (T055)	2.0E-11	0.6	28443625
rs1620977	1	72263459	A	intron_variant	NEGR1	Insomnia	Sign or Symptom (T184)	2.0E-18	0.6	35835914
rs1620977	1	72263459	A	intron_variant	NEGR1	Insomnia	Sign or Symptom (T184)	2.0E-14	0.6	35835914
rs1620977	1	72263459		intron_variant	NEGR1	Educational Achievements	Finding (T033)	2.0E-15	0.6	34855049
rs1620977	1	72263459	A	intron_variant	NEGR1	Insomnia	Sign or Symptom (T184)	1.0E-31	0.6	35835914
rs1620977	1	72263459	A	intron_variant	NEGR1	Depressions,Unipolar	Mental or Behavioral Dysfunction (T048)	1.0E-8	0.6	32959083
rs1620977	1	72263459	A	intron_variant	NEGR1	Endometrioses	Disease or Syndrome (T047)	1.0E-8	0.6	32959083
rs1620977	1	72263459	A	intron_variant	NEGR1	AUTISM SPECTRUM DISORDER	Mental or Behavioral Dysfunction (T048)	7.0E-9	0.6	30804558
rs1620977	1	72263459	A	intron_variant	NEGR1	Body Mass Index	Clinical Attribute (T201)	9.0E-13	0.6	31754094
rs1620977	1	72263459	A	intron_variant	NEGR1	Bipolar Disorders	Mental or Behavioral Dysfunction (T048)	9.0E-13	0.6	31754094
rs1620977	1	72263459	A	intron_variant	NEGR1	Depressions,Unipolar	Mental or Behavioral Dysfunction (T048)	7.0E-9	0.6	30804558
rs1620977	1	72263459	G	intron_variant	NEGR1	Household Income	Finding (T033)	1.0E-8	0.6	31844048
rs1620977	1	72263459	A	intron_variant	NEGR1	Intelligence	Mental Process (T041)	3.0E-11	0.6	29844566
rs1923217	1	73363540	T	intergenic_variant		Bipolar Disorders	Mental or Behavioral Dysfunction (T048)	2.0E-12	0.6	33479212
rs1923217	1	73363540	T	intergenic_variant		Schizophrenias	Mental or Behavioral Dysfunction (T048)	2.0E-12	0.6	33479212
rs1923217	1	73363540	T	intergenic_variant		Attention Deficit Disorder with Hyperactivity	Mental or Behavioral Dysfunction (T048)	2.0E-12	0.6	33479212
rs1923217	1	73363540	T	intergenic_variant		MAJOR DEPRESSIVE DISORDER	Mental or Behavioral Dysfunction (T048)	2.0E-12	0.6	33479212
rs1923217	1	73363540	T	intergenic_variant		AUTISM SPECTRUM DISORDER	Mental or Behavioral Dysfunction (T048)	2.0E-12	0.6	33479212
rs2336147	3	52592427	T	intron_variant	PBRM1	Bipolar Disorders	Mental or Behavioral Dysfunction (T048)	4.0E-13	0.6	34002096
rs2568952	1	72289422	C	intron_variant	LOC105378797	Schizophrenias	Mental or Behavioral Dysfunction (T048)	5.0E-11	0.6	33479212
rs2568952	1	72289422	C	intron_variant	LOC105378797	AUTISM SPECTRUM DISORDER	Mental or Behavioral Dysfunction (T048)	5.0E-11	0.6	33479212
rs2568952	1	72289422	C	intron_variant	LOC105378797	Bipolar Disorders	Mental or Behavioral Dysfunction (T048)	5.0E-11	0.6	33479212
rs2568952	1	72289422	C	intron_variant	LOC105378797	Attention Deficit Disorder with Hyperactivity	Mental or Behavioral Dysfunction (T048)	5.0E-11	0.6	33479212
rs2568952	1	72289422	C	intron_variant	LOC105378797	MAJOR DEPRESSIVE DISORDER	Mental or Behavioral Dysfunction (T048)	5.0E-11	0.6	33479212
rs2953928	8	34294974	G	intron_variant		Bipolar Disorders	Mental or Behavioral Dysfunction (T048)	6.0E-9	0.6	34002096
rs10959753	9	11379630	C	intron_variant	LOC105375974	Depressions,Unipolar	Mental or Behavioral Dysfunction (T048)	1.0E-13	0.6	31926635
rs10959753	9	11379630	C	intron_variant	LOC105375974	Bipolar Disorders	Mental or Behavioral Dysfunction (T048)	1.0E-13	0.6	31926635
rs12552	13	53051646	A	3_prime_UTR_variant	OLFM4	Insomnia	Sign or Symptom (T184)	1.0E-19	0.6	35835914
rs12552	13	53051646	A	3_prime_UTR_variant	OLFM4	Insomnia	Sign or Symptom (T184)	1.0E-19	0.6	35835914
rs12552	13	53051646	A	3_prime_UTR_variant	OLFM4	Insomnia	Sign or Symptom (T184)	3.0E-37	0.6	35835914
rs12552	13	53051646	A	3_prime_UTR_variant	OLFM4	Bipolar Disorders	Mental or Behavioral Dysfunction (T048)	1.0E-23	0.6	31926635
rs4074723	12	23794803	C	intron_variant	SOX5	Bipolar Disorders	Mental or Behavioral Dysfunction (T048)	3.0E-9	0.6	31926635
rs12552	13	53051646	A	3_prime_UTR_variant	OLFM4	Depressions,Unipolar	Mental or Behavioral Dysfunction (T048)	1.0E-23	0.6	31926635
rs4074723	12	23794803	C	intron_variant	SOX5	Depressions,Unipolar	Mental or Behavioral Dysfunction (T048)	3.0E-9	0.6	31926635
rs12552	13	53051646		3_prime_UTR_variant	OLFM4	Anorexia Nervosa	Mental or Behavioral Dysfunction (T048)	1.0E-8	0.6	31835028
rs12552	13	53051646		3_prime_UTR_variant	OLFM4	Gilles de la Tourette's syndrome	Disease or Syndrome (T047)	1.0E-8	0.6	31835028
rs12552	13	53051646	A	3_prime_UTR_variant	OLFM4	AUTISM SPECTRUM DISORDER	Mental or Behavioral Dysfunction (T048)	4.0E-8	0.6	30804558
rs12552	13	53051646	A	3_prime_UTR_variant	OLFM4	Depressions,Unipolar	Mental or Behavioral Dysfunction (T048)	4.0E-8	0.6	30804558
rs12552	13	53051646		3_prime_UTR_variant	OLFM4	Disorders,Obsessive-Compulsive	Mental or Behavioral Dysfunction (T048)	1.0E-8	0.6	31835028
rs12552	13	53051646		3_prime_UTR_variant	OLFM4	Attention Deficit Disorder with Hyperactivity	Mental or Behavioral Dysfunction (T048)	1.0E-8	0.6	31835028
rs12552	13	53051646		3_prime_UTR_variant	OLFM4	AUTISM SPECTRUM DISORDER	Mental or Behavioral Dysfunction (T048)	1.0E-8	0.6	31835028
rs12552	13	53051646	A	3_prime_UTR_variant	OLFM4	Intelligence	Mental Process (T041)	3.0E-8	0.6	29326435
rs12552	13	53051646		3_prime_UTR_variant	OLFM4	Depressions,Unipolar	Mental or Behavioral Dysfunction (T048)	1.0E-8	0.6	31835028
rs12552	13	53051646		3_prime_UTR_variant	OLFM4	Bipolar Disorders	Mental or Behavioral Dysfunction (T048)	1.0E-8	0.6	31835028
rs12552	13	53051646		3_prime_UTR_variant	OLFM4	Schizophrenias	Mental or Behavioral Dysfunction (T048)	1.0E-8	0.6	31835028
rs12552	13	53051646	A	3_prime_UTR_variant	OLFM4	Depressions,Unipolar	Mental or Behavioral Dysfunction (T048)	6.0E-19	0.6	29700475
rs4074723	12	23794803	C	intron_variant	SOX5	Depressions,Unipolar	Mental or Behavioral Dysfunction (T048)	3.0E-8	0.6	29700475
rs12552	13	53051646	A	3_prime_UTR_variant	OLFM4	Depressions,Unipolar	Mental or Behavioral Dysfunction (T048)	2.0E-10	0.6	29942085
rs12552	13	53051646	G	3_prime_UTR_variant	OLFM4	Depressions,Unipolar	Mental or Behavioral Dysfunction (T048)	8.0E-9	0.6	27479909
rs4481150	3	52803777	T	intron_variant	ITIH3	Bipolar Disorders	Mental or Behavioral Dysfunction (T048)	5.0E-14	0.6	33479212
rs4481150	3	52803777	T	intron_variant	ITIH3	Attention Deficit Disorder with Hyperactivity	Mental or Behavioral Dysfunction (T048)	4.0E-9	0.6	33479212
rs4481150	3	52803777	T	intron_variant	ITIH3	MAJOR DEPRESSIVE DISORDER	Mental or Behavioral Dysfunction (T048)	4.0E-9	0.6	33479212
rs4481150	3	52803777	T	intron_variant	ITIH3	Schizophrenias	Mental or Behavioral Dysfunction (T048)	1.0E-13	0.6	33479212
rs4481150	3	52803777	T	intron_variant	ITIH3	Bipolar Disorders	Mental or Behavioral Dysfunction (T048)	4.0E-9	0.6	33479212
rs4481150	3	52803777	T	intron_variant	ITIH3	Schizophrenias	Mental or Behavioral Dysfunction (T048)	4.0E-9	0.6	33479212
rs4481150	3	52803777	T	intron_variant	ITIH3	AUTISM SPECTRUM DISORDER	Mental or Behavioral Dysfunction (T048)	9.0E-9	0.6	33479212
rs4481150	3	52803777	T	intron_variant	ITIH3	AUTISM SPECTRUM DISORDER	Mental or Behavioral Dysfunction (T048)	4.0E-9	0.6	33479212
rs4481150	3	52803777		intron_variant	ITIH3	Schizophrenias	Mental or Behavioral Dysfunction (T048)	2.0E-12	0.6	32606422
rs4481150	3	52803777		intron_variant	ITIH3	Anorexia Nervosa	Mental or Behavioral Dysfunction (T048)	5.0E-17	0.6	31835028
rs4481150	3	52803777		intron_variant	ITIH3	Disorders,Obsessive-Compulsive	Mental or Behavioral Dysfunction (T048)	5.0E-17	0.6	31835028
rs4481150	3	52803777		intron_variant	ITIH3	Gilles de la Tourette's syndrome	Disease or Syndrome (T047)	5.0E-17	0.6	31835028
rs4481150	3	52803777		intron_variant	ITIH3	Bipolar Disorders	Mental or Behavioral Dysfunction (T048)	5.0E-17	0.6	31835028
rs4481150	3	52803777		intron_variant	ITIH3	Schizophrenias	Mental or Behavioral Dysfunction (T048)	5.0E-17	0.6	31835028
rs4481150	3	52803777		intron_variant	ITIH3	Depressions,Unipolar	Mental or Behavioral Dysfunction (T048)	5.0E-17	0.6	31835028
rs4481150	3	52803777		intron_variant	ITIH3	AUTISM SPECTRUM DISORDER	Mental or Behavioral Dysfunction (T048)	5.0E-17	0.6	31835028
rs4481150	3	52803777		intron_variant	ITIH3	Attention Deficit Disorder with Hyperactivity	Mental or Behavioral Dysfunction (T048)	5.0E-17	0.6	31835028
rs11599313	10	104799529		intron_variant	SORCS3	Attention Deficit Disorder with Hyperactivity	Mental or Behavioral Dysfunction (T048)	5.0E-9	0.6	38565336
rs11599313	10	104799529	T	intron_variant	SORCS3	Schizophrenias	Mental or Behavioral Dysfunction (T048)	4.0E-9	0.6	33479212
rs11599313	10	104799529	T	intron_variant	SORCS3	AUTISM SPECTRUM DISORDER	Mental or Behavioral Dysfunction (T048)	4.0E-9	0.6	33479212
rs11599313	10	104799529	T	intron_variant	SORCS3	Bipolar Disorders	Mental or Behavioral Dysfunction (T048)	4.0E-9	0.6	33479212
rs11599313	10	104799529	T	intron_variant	SORCS3	MAJOR DEPRESSIVE DISORDER	Mental or Behavioral Dysfunction (T048)	4.0E-9	0.6	33479212
rs11599313	10	104799529	T	intron_variant	SORCS3	Attention Deficit Disorder with Hyperactivity	Mental or Behavioral Dysfunction (T048)	4.0E-9	0.6	33479212
rs4526442	9	37207272	C	intron_variant	ZCCHC7	Bipolar Disorders	Mental or Behavioral Dysfunction (T048)	8.0E-11	0.6	31926635
rs4526442	9	37207272	C	intron_variant	ZCCHC7	Depressions,Unipolar	Mental or Behavioral Dysfunction (T048)	8.0E-11	0.6	31926635
rs4526442	9	37207272		intron_variant	ZCCHC7	Anorexia Nervosa	Mental or Behavioral Dysfunction (T048)	4.0E-8	0.6	31835028
rs4526442	9	37207272		intron_variant	ZCCHC7	Gilles de la Tourette's syndrome	Disease or Syndrome (T047)	4.0E-8	0.6	31835028
rs4526442	9	37207272		intron_variant	ZCCHC7	Depressions,Unipolar	Mental or Behavioral Dysfunction (T048)	4.0E-8	0.6	31835028
rs4526442	9	37207272		intron_variant	ZCCHC7	Schizophrenias	Mental or Behavioral Dysfunction (T048)	4.0E-8	0.6	31835028
rs4526442	9	37207272		intron_variant	ZCCHC7	Bipolar Disorders	Mental or Behavioral Dysfunction (T048)	4.0E-8	0.6	31835028
rs4526442	9	37207272		intron_variant	ZCCHC7	Attention Deficit Disorder with Hyperactivity	Mental or Behavioral Dysfunction (T048)	4.0E-8	0.6	31835028
rs4526442	9	37207272		intron_variant	ZCCHC7	Disorders,Obsessive-Compulsive	Mental or Behavioral Dysfunction (T048)	4.0E-8	0.6	31835028
rs4526442	9	37207272		intron_variant	ZCCHC7	AUTISM SPECTRUM DISORDER	Mental or Behavioral Dysfunction (T048)	4.0E-8	0.6	31835028
rs6495988	15	38677344	C	intron_variant	LOC105370775	Bipolar affective disorder,depressed,unspecified degree	Mental or Behavioral Dysfunction (T048)	1.0E-9	0.6	34002096
rs12887734	14	103580497	T	intron_variant	COA8	Bipolar Disorders	Mental or Behavioral Dysfunction (T048)	2.0E-11	0.6	33479212
rs12887734	14	103580497	T	intron_variant	COA8	Schizophrenias	Mental or Behavioral Dysfunction (T048)	6.0E-14	0.6	33479212
rs6495988	15	38677344	C	intron_variant	LOC105370775	Bipolar I disorder,hypomanic	Mental or Behavioral Dysfunction (T048)	1.0E-9	0.6	34002096
rs6495988	15	38677344	C	intron_variant	LOC105370775	Bipolar I disorder	Mental or Behavioral Dysfunction (T048)	1.0E-9	0.6	34002096
rs12887734	14	103580497		intron_variant	COA8	Schizophrenias	Mental or Behavioral Dysfunction (T048)	2.0E-13	0.6	31268507
rs12887734	14	103580497	T	intron_variant	COA8	Schizophrenias	Mental or Behavioral Dysfunction (T048)	4.0E-13	0.6	30285260
rs12887734	14	103580497	T	intron_variant	COA8	Schizophrenias	Mental or Behavioral Dysfunction (T048)	1.0E-12	0.6	30285260
rs12887734	14	103580497	T	intron_variant	COA8	Schizophrenias	Mental or Behavioral Dysfunction (T048)	2.0E-12	0.6	28540026
rs12887734	14	103580497	T	intron_variant	COA8	AUTISM SPECTRUM DISORDER	Mental or Behavioral Dysfunction (T048)	2.0E-12	0.6	28540026
rs12887734	14	103580497	T	intron_variant	COA8	Schizophrenias	Mental or Behavioral Dysfunction (T048)	2.0E-13	0.6	26198764
rs12887734	14	103580497	T	intron_variant	COA8	Schizophrenias	Mental or Behavioral Dysfunction (T048)	1.0E-13	0.6	25056061
rs7241572	18	79820712	A	intron_variant	KCNG2	MAJOR DEPRESSIVE DISORDER	Mental or Behavioral Dysfunction (T048)	1.0E-11	0.6	38177345
rs75581564	17	29036732	A	intron_variant		MAJOR DEPRESSIVE DISORDER	Mental or Behavioral Dysfunction (T048)	1.0E-8	0.6	38177345
rs7241572	18	79820712	G	intron_variant	KCNG2	Depressions,Unipolar	Mental or Behavioral Dysfunction (T048)	1.0E-11	0.6	37464041
rs75581564	17	29036732	G	intron_variant		Depressions,Unipolar	Mental or Behavioral Dysfunction (T048)	1.0E-8	0.6	37464041
rs7241572	18	79820712		intron_variant	KCNG2	Depressions,Unipolar	Mental or Behavioral Dysfunction (T048)	1.0E-10	0.6	34924174
rs75581564	17	29036732		intron_variant		Depressions,Unipolar	Mental or Behavioral Dysfunction (T048)	5.0E-9	0.6	34924174
rs7241572	18	79820712	G	intron_variant	KCNG2	Attention Deficit Disorder with Hyperactivity	Mental or Behavioral Dysfunction (T048)	1.0E-22	0.6	34446935
rs7241572	18	79820712	A	intron_variant	KCNG2	MAJOR DEPRESSIVE DISORDER	Mental or Behavioral Dysfunction (T048)	7.0E-9	0.6	33479212
rs7241572	18	79820712	A	intron_variant	KCNG2	Bipolar Disorders	Mental or Behavioral Dysfunction (T048)	7.0E-9	0.6	33479212
rs7241572	18	79820712	G	intron_variant	KCNG2	Abuse,Substance	Mental or Behavioral Dysfunction (T048)	1.0E-22	0.6	34446935
rs75581564	17	29036732		intron_variant		Depressions,Unipolar	Mental or Behavioral Dysfunction (T048)	7.0E-10	0.6	34045744
rs7241572	18	79820712	A	intron_variant	KCNG2	MAJOR DEPRESSIVE DISORDER	Mental or Behavioral Dysfunction (T048)	3.0E-11	0.6	33479212
rs7241572	18	79820712	A	intron_variant	KCNG2	AUTISM SPECTRUM DISORDER	Mental or Behavioral Dysfunction (T048)	7.0E-9	0.6	33479212
rs7241572	18	79820712	A	intron_variant	KCNG2	Attention Deficit Disorder with Hyperactivity	Mental or Behavioral Dysfunction (T048)	7.0E-9	0.6	33479212
rs7241572	18	79820712	A	intron_variant	KCNG2	Schizophrenias	Mental or Behavioral Dysfunction (T048)	7.0E-9	0.6	33479212
rs75581564	17	29036732	A	intron_variant		Bipolar Disorders	Mental or Behavioral Dysfunction (T048)	2.0E-10	0.6	31926635
rs75581564	17	29036732	A	intron_variant		Depressions,Unipolar	Mental or Behavioral Dysfunction (T048)	2.0E-10	0.6	31926635
rs75581564	17	29036732	A	intron_variant		Depressions,Unipolar	Mental or Behavioral Dysfunction (T048)	3.0E-13	0.6	30718901
rs7241572	18	79820712	A	intron_variant	KCNG2	Depressions,Unipolar	Mental or Behavioral Dysfunction (T048)	3.0E-13	0.6	30718901
rs12658032	5	104568525		intron_variant		Anxiety	Mental or Behavioral Dysfunction (T048)	4.0E-10	0.6	34634379
rs12658032	5	104568525		intron_variant		Social fear	Mental or Behavioral Dysfunction (T048)	4.0E-10	0.6	34634379
rs12658032	5	104568525		intron_variant		Anxiousness	Mental Process (T041)	4.0E-10	0.6	34634379
rs12658032	5	104568525		intron_variant		MAJOR DEPRESSIVE DISORDER	Mental or Behavioral Dysfunction (T048)	1.0E-10	0.6	34634379
rs12658032	5	104568525		intron_variant		stress related disorder	Mental or Behavioral Dysfunction (T048)	4.0E-10	0.6	34634379
rs12658032	5	104568525		intron_variant		MAJOR DEPRESSIVE DISORDER	Mental or Behavioral Dysfunction (T048)	4.0E-10	0.6	34634379
rs12658032	5	104568525		intron_variant		Hypervigilance	Mental or Behavioral Dysfunction (T048)	4.0E-10	0.6	34634379
rs7707252	5	79544787		intron_variant		Bipolar Disorders	Mental or Behavioral Dysfunction (T048)	2.0E-8	0.6	33686288
rs12658032	5	104568525		intron_variant		Cerebrovascular accident	Disease or Syndrome (T047)	1.0E-11	0.6	34859065
rs7707252	5	79544787		intron_variant		Attention Deficit Disorder with Hyperactivity	Mental or Behavioral Dysfunction (T048)	2.0E-8	0.6	33686288
rs12658032	5	104568525		intron_variant		MAJOR DEPRESSIVE DISORDER	Mental or Behavioral Dysfunction (T048)	1.0E-11	0.6	34859065
rs12658032	5	104568525	A	intron_variant		Attention Deficit Disorder with Hyperactivity	Mental or Behavioral Dysfunction (T048)	1.0E-13	0.6	33479212
rs12658032	5	104568525	A	intron_variant		Bipolar Disorders	Mental or Behavioral Dysfunction (T048)	2.0E-16	0.6	31926635
rs12658032	5	104568525		intron_variant		Attention Deficit Disorder with Hyperactivity	Mental or Behavioral Dysfunction (T048)	1.0E-10	0.6	32606422
rs12658032	5	104568525	A	intron_variant		Depressions,Unipolar	Mental or Behavioral Dysfunction (T048)	2.0E-16	0.6	31926635
rs12658032	5	104568525	G	intron_variant		Insomnia	Sign or Symptom (T184)	5.0E-9	0.6	32332799
rs9834970	3	36814539		downstream_gene_variant		Bipolar Disorders	Mental or Behavioral Dysfunction (T048)	1.0E-8	0.8	36753304
rs9834970	3	36814539		downstream_gene_variant		Bipolar Disorders	Mental or Behavioral Dysfunction (T048)	3.0E-16	0.8	34159505
rs9834970	3	36814539		downstream_gene_variant		Bipolar Disorders	Mental or Behavioral Dysfunction (T048)		0.8	32791513
rs9834970	3	36814539		downstream_gene_variant		Bipolar Disorders	Mental or Behavioral Dysfunction (T048)	6.0E-12	0.8	33686288
rs9834970	3	36814539	T	downstream_gene_variant		Bipolar Disorders	Mental or Behavioral Dysfunction (T048)	7.0E-19	0.8	34002096
rs9834970	3	36814539	T	downstream_gene_variant		Bipolar Disorders	Mental or Behavioral Dysfunction (T048)	4.0E-12	0.8	33263727
rs9834970	3	36814539		downstream_gene_variant		Bipolar Disorders	Mental or Behavioral Dysfunction (T048)	2.0E-12	0.8	33686288
rs9834970	3	36814539	T	downstream_gene_variant		Bipolar Disorders	Mental or Behavioral Dysfunction (T048)	3.0E-15	0.8	33479212
rs9834970	3	36814539		downstream_gene_variant		Bipolar Disorders	Mental or Behavioral Dysfunction (T048)	2.0E-11	0.8	33686288
rs9834970	3	36814539		downstream_gene_variant		Bipolar Disorders	Mental or Behavioral Dysfunction (T048)	4.0E-12	0.8	32606422
rs9834970	3	36814539		downstream_gene_variant		Bipolar Disorders	Mental or Behavioral Dysfunction (T048)	6.0E-16	0.8	32606422
rs9834970	3	36814539		downstream_gene_variant		Bipolar Disorders	Mental or Behavioral Dysfunction (T048)	2.0E-17	0.8	31835028
rs9834970	3	36814539	C	downstream_gene_variant		Bipolar Disorders	Mental or Behavioral Dysfunction (T048)	6.0E-12	0.8	31043756
rs9834970	3	36814539	C	downstream_gene_variant		Bipolar Disorders	Mental or Behavioral Dysfunction (T048)	2.0E-9	0.8	28115744
rs9834970	3	36814539		downstream_gene_variant		Bipolar Disorders	Mental or Behavioral Dysfunction (T048)	2.0E-10	0.8	28072414
rs9834970	3	36814539	C	downstream_gene_variant		Bipolar Disorders	Mental or Behavioral Dysfunction (T048)	8.0E-7	0.8	26503763
rs9834970	3	36814539	T	downstream_gene_variant		Bipolar Disorders	Mental or Behavioral Dysfunction (T048)	5.0E-10	0.8	27329760
rs9834970	3	36814539		downstream_gene_variant		Bipolar Disorders	Mental or Behavioral Dysfunction (T048)	1.0E-10	0.8	24280982
rs9834970	3	36814539		downstream_gene_variant		Bipolar Disorders	Mental or Behavioral Dysfunction (T048)	4.0E-7	0.8	24280982
rs9834970	3	36814539	C	downstream_gene_variant		Bipolar Disorders	Mental or Behavioral Dysfunction (T048)	1.0E-12	0.8	22182935
rs9834970	3	36814539		downstream_gene_variant		Bipolar Disorders	Mental or Behavioral Dysfunction (T048)	1.0E-7	0.8	23092984
rs9834970	3	36814539		downstream_gene_variant		Bipolar Disorders	Mental or Behavioral Dysfunction (T048)		0.8	20414141
rs9834970	3	36814539		downstream_gene_variant		Gastroduodenal Ulcers	Disease or Syndrome (T047)	1.0E-8	0.6	36753304
rs9834970	3	36814539		downstream_gene_variant		Schizophrenias	Mental or Behavioral Dysfunction (T048)	5.0E-13	0.6	34159505
rs9834970	3	36814539		downstream_gene_variant		Attention Deficit Disorder with Hyperactivity	Mental or Behavioral Dysfunction (T048)	6.0E-12	0.6	33686288
rs9834970	3	36814539	T	downstream_gene_variant		Bipolar I disorder,hypomanic	Mental or Behavioral Dysfunction (T048)	1.0E-21	0.6	34002096
rs9834970	3	36814539	T	downstream_gene_variant		Bipolar I disorder	Mental or Behavioral Dysfunction (T048)	1.0E-21	0.6	34002096
rs9834970	3	36814539		downstream_gene_variant		AUTISM SPECTRUM DISORDER	Mental or Behavioral Dysfunction (T048)	2.0E-11	0.6	33686288
rs9834970	3	36814539		downstream_gene_variant		Depressions,Unipolar	Mental or Behavioral Dysfunction (T048)	2.0E-12	0.6	33686288
rs9834970	3	36814539	T	downstream_gene_variant		Bipolar affective disorder,depressed,unspecified degree	Mental or Behavioral Dysfunction (T048)	1.0E-21	0.6	34002096
rs12154473	7	1942546		intron_variant	MAD1L1	Bipolar I disorder	Mental or Behavioral Dysfunction (T048)	3.0E-8	0.6	35912095
rs12154473	7	1942546		intron_variant	MAD1L1	Bipolar affective disorder,depressed,unspecified degree	Mental or Behavioral Dysfunction (T048)	3.0E-8	0.6	35912095
rs12154473	7	1942546		intron_variant	MAD1L1	Bipolar II disorder	Mental or Behavioral Dysfunction (T048)	3.0E-8	0.6	35912095
rs12154473	7	1942546		intron_variant	MAD1L1	Bipolar I disorder,hypomanic	Mental or Behavioral Dysfunction (T048)	3.0E-8	0.6	35912095
rs113779084	7	11832161	G	5_prime_UTR_variant	THSD7A	Bipolar I disorder,hypomanic	Mental or Behavioral Dysfunction (T048)	2.0E-11	0.6	34002096
rs12154473	7	1942546	A	intron_variant	MAD1L1	Bipolar affective disorder,depressed,unspecified degree	Mental or Behavioral Dysfunction (T048)	9.0E-15	0.6	34002096
rs113779084	7	11832161	G	5_prime_UTR_variant	THSD7A	Bipolar Disorders	Mental or Behavioral Dysfunction (T048)	1.0E-13	0.6	34002096
rs113779084	7	11832161	G	5_prime_UTR_variant	THSD7A	Bipolar affective disorder,depressed,unspecified degree	Mental or Behavioral Dysfunction (T048)	2.0E-11	0.6	34002096
rs12154473	7	1942546	A	intron_variant	MAD1L1	Bipolar I disorder,hypomanic	Mental or Behavioral Dysfunction (T048)	9.0E-15	0.6	34002096
rs12154473	7	1942546	A	intron_variant	MAD1L1	Bipolar Disorders	Mental or Behavioral Dysfunction (T048)	3.0E-10	0.6	33479212
rs113779084	7	11832161	G	5_prime_UTR_variant	THSD7A	Bipolar I disorder	Mental or Behavioral Dysfunction (T048)	2.0E-11	0.6	34002096
rs12154473	7	1942546	A	intron_variant	MAD1L1	Bipolar I disorder	Mental or Behavioral Dysfunction (T048)	9.0E-15	0.6	34002096
rs113779084	7	11832161	A	5_prime_UTR_variant	THSD7A	Bipolar Disorders	Mental or Behavioral Dysfunction (T048)	3.0E-9	0.6	31043756
rs12290811	11	79372576		intron_variant	TENM4	Bipolar Disorders	Mental or Behavioral Dysfunction (T048)		0.7	25124521
rs12290811	11	79372576	A	intron_variant	TENM4	Bipolar Disorders	Mental or Behavioral Dysfunction (T048)	1.0E-9	0.7	24618891
rs12289486	11	79381483	C	intron_variant	TENM4	Bipolar Disorders	Mental or Behavioral Dysfunction (T048)	3.0E-8	0.6	34002096
rs12672003	7	24607603	A	intron_variant	PALS2	Bipolar Disorders	Mental or Behavioral Dysfunction (T048)	3.0E-9	0.6	34002096
rs116052126	7	24735895	A	intron_variant	GSDME	Bipolar Disorders	Mental or Behavioral Dysfunction (T048)	2.0E-10	0.6	33479212
rs12672003	7	24607603	A	intron_variant	PALS2	Bipolar Disorders	Mental or Behavioral Dysfunction (T048)	3.0E-8	0.6	33263727
rs13135092	4	102276925	G	intron_variant	SLC39A8	Body Mass Index	Clinical Attribute (T201)	2.0E-28	0.6	38538606
rs13135092	4	102276925		intron_variant	SLC39A8	Opioid use disorder	Mental or Behavioral Dysfunction (T048)	2.0E-12	0.6	37156939
rs13135092	4	102276925		intron_variant	SLC39A8	Arthritides,Degenerative	Disease or Syndrome (T047)	9.0E-16	0.6	36411363
rs13135092	4	102276925		intron_variant	SLC39A8	Opioid use disorder	Mental or Behavioral Dysfunction (T048)	4.0E-10	0.6	35879402
rs13135092	4	102276925	A	intron_variant	SLC39A8	Educational Achievements	Finding (T033)	4.0E-58	0.6	35361970
rs13135092	4	102276925		intron_variant	SLC39A8	Schizophrenias	Mental or Behavioral Dysfunction (T048)	6.0E-11	0.6	34159505
rs78308718	5	7533872	T	intron_variant	ADCY2	Bipolar I disorder	Mental or Behavioral Dysfunction (T048)	7.0E-11	0.6	34002096
rs13135092	4	102276925		intron_variant	SLC39A8	Attention Deficit Disorder with Hyperactivity	Mental or Behavioral Dysfunction (T048)	4.0E-8	0.6	33686288
rs78308718	5	7533872	T	intron_variant	ADCY2	Bipolar I disorder,hypomanic	Mental or Behavioral Dysfunction (T048)	7.0E-11	0.6	34002096
rs13135092	4	102276925		intron_variant	SLC39A8	Schizophrenias	Mental or Behavioral Dysfunction (T048)	6.0E-9	0.6	33686288
rs13135092	4	102276925		intron_variant	SLC39A8	Schizophrenias	Mental or Behavioral Dysfunction (T048)	4.0E-8	0.6	33686288
rs13135092	4	102276925	A	intron_variant	SLC39A8	Schizophrenias	Mental or Behavioral Dysfunction (T048)	9.0E-13	0.6	33479212
rs78308718	5	7533872	T	intron_variant	ADCY2	Bipolar affective disorder,depressed,unspecified degree	Mental or Behavioral Dysfunction (T048)	7.0E-11	0.6	34002096
rs13135092	4	102276925		intron_variant	SLC39A8	Anorexia Nervosa	Mental or Behavioral Dysfunction (T048)	6.0E-9	0.6	33686288
rs13135092	4	102276925	A	intron_variant	SLC39A8	Bipolar Disorders	Mental or Behavioral Dysfunction (T048)	2.0E-8	0.6	33479212
rs13135092	4	102276925		intron_variant	SLC39A8	Bipolar Disorders	Mental or Behavioral Dysfunction (T048)	1.0E-8	0.6	32606422
rs13135092	4	102276925	G	intron_variant	SLC39A8	Decreased HDL	Finding (T033)	2.0E-10	0.6	30698716
rs13135092	4	102276925	G	intron_variant	SLC39A8	Decreased HDL	Finding (T033)	2.0E-32	0.6	30698716
rs13135092	4	102276925	G	intron_variant	SLC39A8	Decreased HDL	Finding (T033)	2.0E-7	0.6	30698716
rs13135092	4	102276925	G	intron_variant	SLC39A8	Decreased HDL	Finding (T033)	1.0E-29	0.6	30698716
rs13135092	4	102276925	G	intron_variant	SLC39A8	Decreased HDL	Finding (T033)	4.0E-8	0.6	30698716
rs13135092	4	102276925	G	intron_variant	SLC39A8	ALCOHOL USE	Individual Behavior (T055)	2.0E-31	0.6	30698716
rs13135092	4	102276925	G	intron_variant	SLC39A8	Decreased HDL	Finding (T033)	7.0E-11	0.6	30698716
rs13135092	4	102276925	G	intron_variant	SLC39A8	Decreased HDL	Finding (T033)	2.0E-33	0.6	30698716
rs13135092	4	102276925	G	intron_variant	SLC39A8	ALCOHOL USE	Individual Behavior (T055)	1.0E-29	0.6	30698716
rs13135092	4	102276925	A	intron_variant	SLC39A8	Backache	Sign or Symptom (T184)	3.0E-8	0.6	30747904
rs13135092	4	102276925	G	intron_variant	SLC39A8	Decreased HDL	Finding (T033)	2.0E-31	0.6	30698716
rs13135092	4	102276925	A	intron_variant	SLC39A8	Decreased HDL	Finding (T033)	2.0E-19	0.6	29507422
rs13135092	4	102276925	A	intron_variant	SLC39A8	Decreased HDL	Finding (T033)	7.0E-21	0.6	29507422
rs13135092	4	102276925	A	intron_variant	SLC39A8	Decreased HDL	Finding (T033)	3.0E-13	0.6	25961943
rs16851203	1	177400897	C	intron_variant		Bipolar Disorders	Mental or Behavioral Dysfunction (T048)	2.0E-9	0.6	31926635
rs16851203	1	177400897	C	intron_variant		Depressions,Unipolar	Mental or Behavioral Dysfunction (T048)	2.0E-9	0.6	31926635
rs17203016	2	207390794	A	intron_variant		Body Mass Index	Clinical Attribute (T201)	1.0E-14	0.6	36376304
rs17203016	2	207390794	G	intron_variant		Body Mass Index	Clinical Attribute (T201)	1.0E-14	0.6	36581621
rs17183814	2	165295879	A	splice_acceptor_variant	SCN2A	Educational Achievements	Finding (T033)	1.0E-16	0.6	35361970
rs17183814	2	165295879		splice_acceptor_variant	SCN2A	Bipolar Disorders	Mental or Behavioral Dysfunction (T048)	7.0E-11	0.6	33686288
rs17183814	2	165295879	A	splice_acceptor_variant	SCN2A	Bipolar Disorders	Mental or Behavioral Dysfunction (T048)	2.0E-9	0.6	33263727
rs17183814	2	165295879		splice_acceptor_variant	SCN2A	Attention Deficit Disorder with Hyperactivity	Mental or Behavioral Dysfunction (T048)	7.0E-11	0.6	33686288
rs17183814	2	165295879	G	splice_acceptor_variant	SCN2A	Bipolar Disorders	Mental or Behavioral Dysfunction (T048)	3.0E-8	0.6	34002096
rs17183814	2	165295879	G	splice_acceptor_variant	SCN2A	Bipolar Disorders	Mental or Behavioral Dysfunction (T048)	2.0E-9	0.6	31043756
rs17203016	2	207390794	A	intron_variant		Bipolar Disorders	Mental or Behavioral Dysfunction (T048)	1.0E-8	0.6	31754094
rs17203016	2	207390794	A	intron_variant		Body Mass Index	Clinical Attribute (T201)	1.0E-8	0.6	31754094
rs17203016	2	207390794	A	intron_variant		Body Mass Index	Clinical Attribute (T201)	1.0E-9	0.6	30108127
rs17203016	2	207390794	G	intron_variant		Body Mass Index	Clinical Attribute (T201)	8.0E-8	0.6	25673413
rs17203016	2	207390794	G	intron_variant		Body Mass Index	Clinical Attribute (T201)	3.0E-8	0.6	25673413
rs12576775	11	79366149	G	intron_variant	TENM4	Bipolar Disorders	Mental or Behavioral Dysfunction (T048)	3.0E-9	0.8	28115744
rs12576775	11	79366149		intron_variant	TENM4	Bipolar Disorders	Mental or Behavioral Dysfunction (T048)		0.8	27864917
rs12576775	11	79366149		intron_variant	TENM4	Bipolar Disorders	Mental or Behavioral Dysfunction (T048)		0.8	23611537
rs12576775	11	79366149		intron_variant	TENM4	Bipolar Disorders	Mental or Behavioral Dysfunction (T048)	4.0E-8	0.8	23453885
rs12576775	11	79366149	G	intron_variant	TENM4	Bipolar Disorders	Mental or Behavioral Dysfunction (T048)	4.0E-8	0.8	21926972
rs61867293	10	104804166	C	intron_variant	SORCS3	Depressions,Unipolar	Mental or Behavioral Dysfunction (T048)	6.0E-12	0.6	31926635
rs61867293	10	104804166	C	intron_variant	SORCS3	Bipolar Disorders	Mental or Behavioral Dysfunction (T048)	6.0E-12	0.6	31926635
rs61867293	10	104804166	T	intron_variant	SORCS3	Depressions,Unipolar	Mental or Behavioral Dysfunction (T048)	1.0E-6	0.6	30804558
rs61867293	10	104804166	T	intron_variant	SORCS3	AUTISM SPECTRUM DISORDER	Mental or Behavioral Dysfunction (T048)	1.0E-6	0.6	30804558
rs61867293	10	104804166		intron_variant	SORCS3	AUTISM SPECTRUM DISORDER	Mental or Behavioral Dysfunction (T048)	8.0E-15	0.6	31835028
rs61867293	10	104804166		intron_variant	SORCS3	Schizophrenias	Mental or Behavioral Dysfunction (T048)	8.0E-15	0.6	31835028
rs61867293	10	104804166		intron_variant	SORCS3	Bipolar Disorders	Mental or Behavioral Dysfunction (T048)	8.0E-15	0.6	31835028
rs61867293	10	104804166		intron_variant	SORCS3	Disorders,Obsessive-Compulsive	Mental or Behavioral Dysfunction (T048)	8.0E-15	0.6	31835028
rs61867293	10	104804166		intron_variant	SORCS3	Gilles de la Tourette's syndrome	Disease or Syndrome (T047)	8.0E-15	0.6	31835028
rs61867293	10	104804166		intron_variant	SORCS3	Depressions,Unipolar	Mental or Behavioral Dysfunction (T048)	8.0E-15	0.6	31835028
rs61867293	10	104804166		intron_variant	SORCS3	Anorexia Nervosa	Mental or Behavioral Dysfunction (T048)	8.0E-15	0.6	31835028
rs61867293	10	104804166		intron_variant	SORCS3	Attention Deficit Disorder with Hyperactivity	Mental or Behavioral Dysfunction (T048)	8.0E-15	0.6	31835028
rs61867293	10	104804166	C	intron_variant	SORCS3	Depressions,Unipolar	Mental or Behavioral Dysfunction (T048)	7.0E-10	0.6	29700475
rs12576775	11	79366149	A	intron_variant	TENM4	Acute myeloid leukemia	Neoplastic Process (T191)	3.0E-12	0.6	27903959
rs12576775	11	79366149	G	intron_variant	TENM4	Acute myeloid leukemia	Neoplastic Process (T191)	1.0E-7	0.6	27903959
rs12576775	11	79366149		intron_variant	TENM4	AUTISM SPECTRUM DISORDER	Mental or Behavioral Dysfunction (T048)	4.0E-8	0.6	23453885
rs12576775	11	79366149		intron_variant	TENM4	Attention Deficit Disorder with Hyperactivity	Mental or Behavioral Dysfunction (T048)	4.0E-8	0.6	23453885
rs12576775	11	79366149		intron_variant	TENM4	Depressions,Unipolar	Mental or Behavioral Dysfunction (T048)	4.0E-8	0.6	23453885
rs12576775	11	79366149		intron_variant	TENM4	Schizophrenias	Mental or Behavioral Dysfunction (T048)	4.0E-8	0.6	23453885
rs62489493	8	9906071	C	non_coding_transcript_exon_variant		Bipolar Disorders	Mental or Behavioral Dysfunction (T048)	3.0E-11	0.6	34002096
rs79879286	7	24786970	C	intron_variant		Depressions,Unipolar	Mental or Behavioral Dysfunction (T048)	2.0E-11	0.6	31926635
rs79879286	7	24786970	C	intron_variant		Bipolar Disorders	Mental or Behavioral Dysfunction (T048)	2.0E-11	0.6	31926635
rs79879286	7	24786970		intron_variant		AUTISM SPECTRUM DISORDER	Mental or Behavioral Dysfunction (T048)	7.0E-11	0.6	31835028
rs79879286	7	24786970		intron_variant		Attention Deficit Disorder with Hyperactivity	Mental or Behavioral Dysfunction (T048)	7.0E-11	0.6	31835028
rs79879286	7	24786970		intron_variant		Depressions,Unipolar	Mental or Behavioral Dysfunction (T048)	7.0E-11	0.6	31835028
rs79879286	7	24786970		intron_variant		Anorexia Nervosa	Mental or Behavioral Dysfunction (T048)	7.0E-11	0.6	31835028
rs79879286	7	24786970		intron_variant		Bipolar Disorders	Mental or Behavioral Dysfunction (T048)	7.0E-11	0.6	31835028
rs79879286	7	24786970		intron_variant		Disorders,Obsessive-Compulsive	Mental or Behavioral Dysfunction (T048)	7.0E-11	0.6	31835028
rs79879286	7	24786970		intron_variant		Schizophrenias	Mental or Behavioral Dysfunction (T048)	7.0E-11	0.6	31835028
rs79879286	7	24786970		intron_variant		Gilles de la Tourette's syndrome	Disease or Syndrome (T047)	7.0E-11	0.6	31835028
rs6073621	20	45066802	A	non_coding_transcript_exon_variant	STK4	Bipolar I disorder,hypomanic	Mental or Behavioral Dysfunction (T048)	1.0E-9	0.6	34002096
rs6079469	20	14520495	A	intron_variant	MACROD2	Bipolar Disorders	Mental or Behavioral Dysfunction (T048)	1.0E-9	0.6	33169155
rs6073621	20	45066802	A	non_coding_transcript_exon_variant	STK4	Bipolar affective disorder,depressed,unspecified degree	Mental or Behavioral Dysfunction (T048)	1.0E-9	0.6	34002096
rs6073621	20	45066802	A	non_coding_transcript_exon_variant	STK4	Bipolar I disorder	Mental or Behavioral Dysfunction (T048)	1.0E-9	0.6	34002096
rs67712855	20	45053910	T	intron_variant	STK4	Bipolar Disorders	Mental or Behavioral Dysfunction (T048)	4.0E-11	0.6	34002096
rs12704290	7	86798310		intron_variant	GRM3	Schizophrenias	Mental or Behavioral Dysfunction (T048)	2.0E-10	0.7	33686288
rs12704290	7	86798310	A	intron_variant	GRM3	Schizophrenias	Mental or Behavioral Dysfunction (T048)	8.0E-11	0.7	33479212
rs12704290	7	86798310		intron_variant	GRM3	Schizophrenias	Mental or Behavioral Dysfunction (T048)	6.0E-9	0.7	32606422
rs12704290	7	86798310		intron_variant	GRM3	Schizophrenias	Mental or Behavioral Dysfunction (T048)	2.0E-10	0.7	32606422
rs12704290	7	86798310		intron_variant	GRM3	Schizophrenias	Mental or Behavioral Dysfunction (T048)	8.0E-9	0.7	31374203
rs12704290	7	86798310	G	intron_variant	GRM3	Schizophrenias	Mental or Behavioral Dysfunction (T048)	3.0E-10	0.7	30285260
rs12704290	7	86798310	G	intron_variant	GRM3	Schizophrenias	Mental or Behavioral Dysfunction (T048)	4.0E-10	0.7	30285260
rs12704290	7	86798310		intron_variant	GRM3	Schizophrenias	Mental or Behavioral Dysfunction (T048)	3.0E-10	0.7	31835028
rs12704290	7	86798310		intron_variant	GRM3	Schizophrenias	Mental or Behavioral Dysfunction (T048)	2.0E-11	0.7	31268507
rs12704290	7	86798310		intron_variant	GRM3	Schizophrenias	Mental or Behavioral Dysfunction (T048)	4.0E-14	0.7	29483656
rs12704290	7	86798310		intron_variant	GRM3	Schizophrenias	Mental or Behavioral Dysfunction (T048)	1.0E-10	0.7	28540026
rs12704290	7	86798310	G	intron_variant	GRM3	Schizophrenias	Mental or Behavioral Dysfunction (T048)	3.0E-10	0.7	28991256
rs12704290	7	86798310		intron_variant	GRM3	Schizophrenias	Mental or Behavioral Dysfunction (T048)		0.7	26187343
rs12704290	7	86798310	G	intron_variant	GRM3	Schizophrenias	Mental or Behavioral Dysfunction (T048)	7.0E-11	0.7	26198764
rs12704290	7	86798310	G	intron_variant	GRM3	Schizophrenias	Mental or Behavioral Dysfunction (T048)	3.0E-10	0.7	25056061
rs12704290	7	86798310	A	intron_variant	GRM3	Bipolar Disorders	Mental or Behavioral Dysfunction (T048)	3.0E-9	0.6	33479212
rs12704290	7	86798310		intron_variant	GRM3	Attention Deficit Disorder with Hyperactivity	Mental or Behavioral Dysfunction (T048)	2.0E-10	0.6	33686288
rs12704290	7	86798310		intron_variant	GRM3	Bipolar Disorders	Mental or Behavioral Dysfunction (T048)	1.0E-9	0.6	32606422
rs12704290	7	86798310		intron_variant	GRM3	Anorexia Nervosa	Mental or Behavioral Dysfunction (T048)	3.0E-10	0.6	31835028
rs12704290	7	86798310		intron_variant	GRM3	Intelligence	Mental Process (T041)	8.0E-9	0.6	31374203
rs12704290	7	86798310		intron_variant	GRM3	Disorders,Obsessive-Compulsive	Mental or Behavioral Dysfunction (T048)	3.0E-10	0.6	31835028
rs12704290	7	86798310		intron_variant	GRM3	Depressions,Unipolar	Mental or Behavioral Dysfunction (T048)	3.0E-10	0.6	31835028
rs12704290	7	86798310		intron_variant	GRM3	Gilles de la Tourette's syndrome	Disease or Syndrome (T047)	3.0E-10	0.6	31835028
rs12704290	7	86798310		intron_variant	GRM3	Attention Deficit Disorder with Hyperactivity	Mental or Behavioral Dysfunction (T048)	3.0E-10	0.6	31835028
rs12704290	7	86798310		intron_variant	GRM3	Bipolar Disorders	Mental or Behavioral Dysfunction (T048)	3.0E-10	0.6	31835028
rs12704290	7	86798310		intron_variant	GRM3	AUTISM SPECTRUM DISORDER	Mental or Behavioral Dysfunction (T048)	3.0E-10	0.6	31835028
rs12704290	7	86798310		intron_variant	GRM3	AUTISM SPECTRUM DISORDER	Mental or Behavioral Dysfunction (T048)	1.0E-10	0.6	28540026
